# Supplementary material for: Activation of ER Stress-Dependent miR-216b Has a Critical Role in Salvia miltiorrhiza Ethanol-Extract-Induced Apoptosis in U266 and U937 Cells
Source: MDPI journal article supplement (doi:10.3390/ijms19041240), 2018-04-19
Supplement: s1 [file s1]

# Activation of ER Stress-Dependent miR-216b Has a Critical Role in *Salvia miltiorrhiza* Ethanol-Extract-Induced Apoptosis in U266 and U937 Cells

Changmin Kim <sup>1,†</sup>, Hyo-Sook Song <sup>2,†</sup>, Hojung Park <sup>1,†</sup> and Bonglee Kim <sup>1,\*</sup>

<sup>1</sup> Department of Pathology, College of Korean Medicine, Graduate School, Kyung Hee University, 1 Hoegi-dong, Dongdaemun-gu, Seoul 130-701, Korea; ckdals4302@khu.ac.kr (C.K.); rosapark93@khu.ac.kr (H.P.)

<sup>2</sup> Department of Science in Korean Medicine, College of Korean Medicine, Graduate School, Kyung Hee University, 1 Hoegi-dong, Dongdaemun-gu, Seoul 130-701, Korea; shs331@khu.ac.kr

\* Correspondence: bongleekim@khu.ac.kr; Tel.: +82-2-961-9217

† These authors contributed equally to this work.

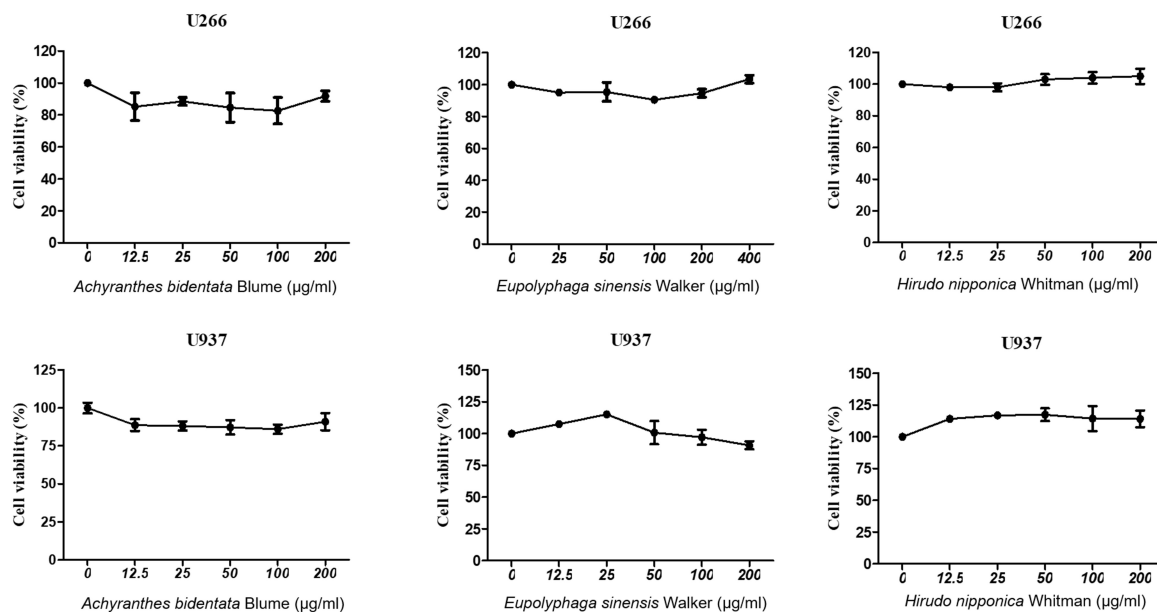

**Supplementary Figure S1.** Cytotoxic effect of *Achyranthes bidentata* Blume (ABB), *Eupolyphaga sinensis* Walker (ESW) and *Hirudo nipponica* Whitman (HNW) in U937 and U266 cells. Cells were seeded into 96 well microplates at a density of  $2 \times 10^4$  cells/well and treated with various concentrations of ABB, ESW and HNW (0, 12.5, 25, 50, 100 or 200 μg/ml) for 24 h. Cell viability was measured by EZ-cytox Enhanced cell viability assay kit. Values represent the means of 3 experiments  $\pm$  SD.

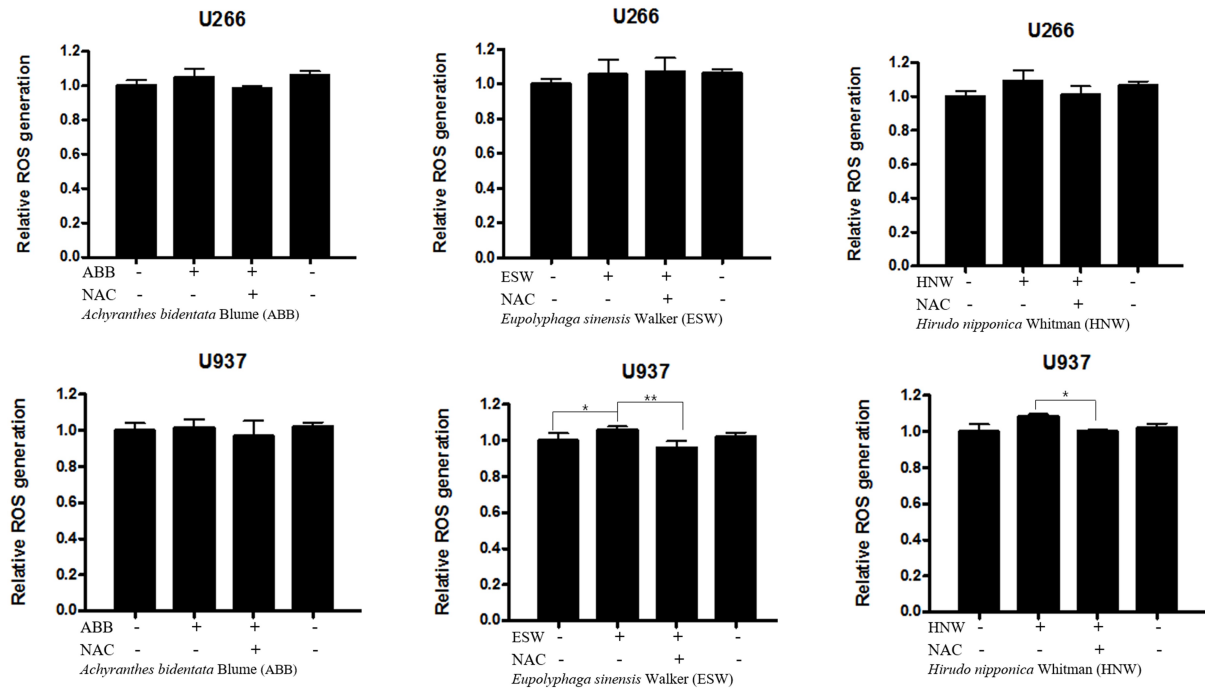

**Supplementary Figure S2.** The effect of COM on ROS production in *Achyranthes bidentata* Blume (ABB), *Eupolyphaga sinensis* Walker (ESW), *Hirudo nipponica* Whitman (HNW) treated U937 and U266 cells. Cells were treated with indicated extracts (80  $\mu\text{g/ml}$ ) for 24 h with or without pre-treatment of NAC (5 mM) for 1 h. ROS production was determined by cellular reactive oxygen species detection assay kit. Values represent the means of 3 experiments  $\pm$  SD.
